# Supplementary material for: Nitrogen-doped lignin-derived carbon for catalytic reduction of hexavalent chromium via HCOOH-mediated hydrogenation
Source: Royal Society of Chemistry journal article supplement (doi:10.1039/d1ra06391j), 2022-01-01
Supplement: d1ra06391j1.pdf [file d1ra06391j1.pdf]

Supplementary files

**Nitrogen-doped lignin-derived carbon for catalytic reduction of  
hexavalent chromium via HCOOH-mediated hydrogenation**

Yun Liu\*, Haihua Yang

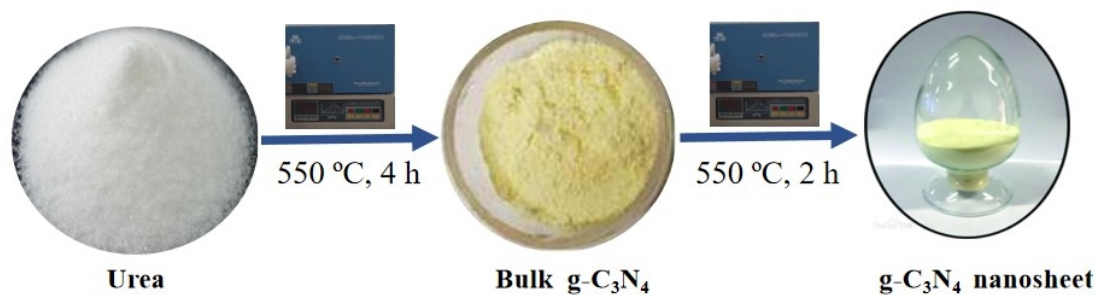

Fig. S1 Preparation of g-C<sub>3</sub>N<sub>4</sub> nanosheets through duplicate thermal decomposition of urea.

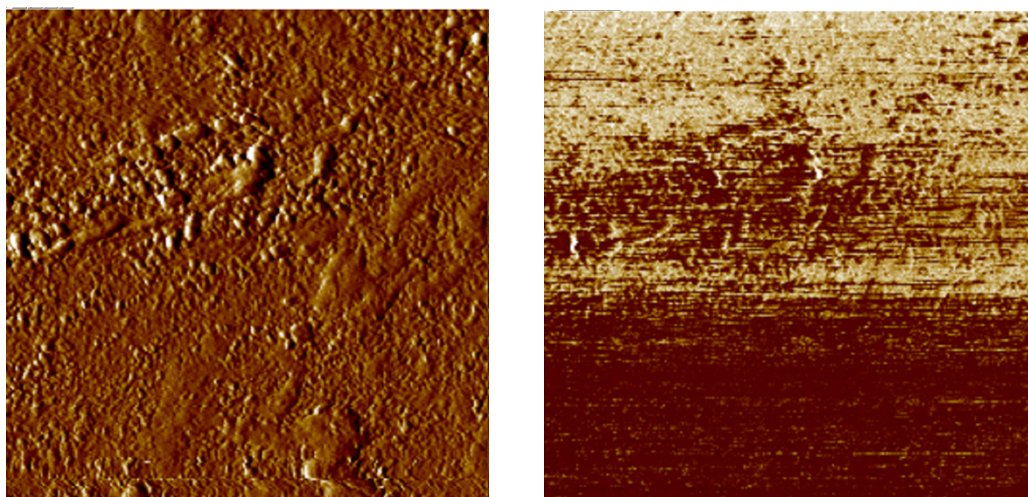

Fig. S2 AFM images of N@C-g-C<sub>3</sub>N<sub>4</sub>. left picture is for amplitude, and right picture stands for phase image.

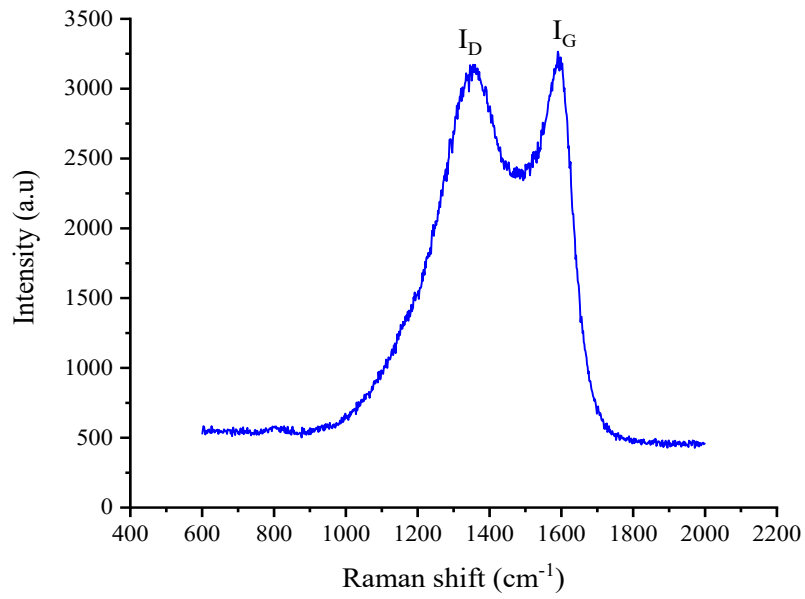

Fig. S3 Raman spectrum of N@C-g-C<sub>3</sub>N<sub>4</sub>-950. The peak at 1350 is assigned to disordered sp<sup>3</sup> carbon (I<sub>D</sub>) and the peak at 1590 nm is assigned to graphitic sp<sup>2</sup> carbon (I<sub>G</sub>).

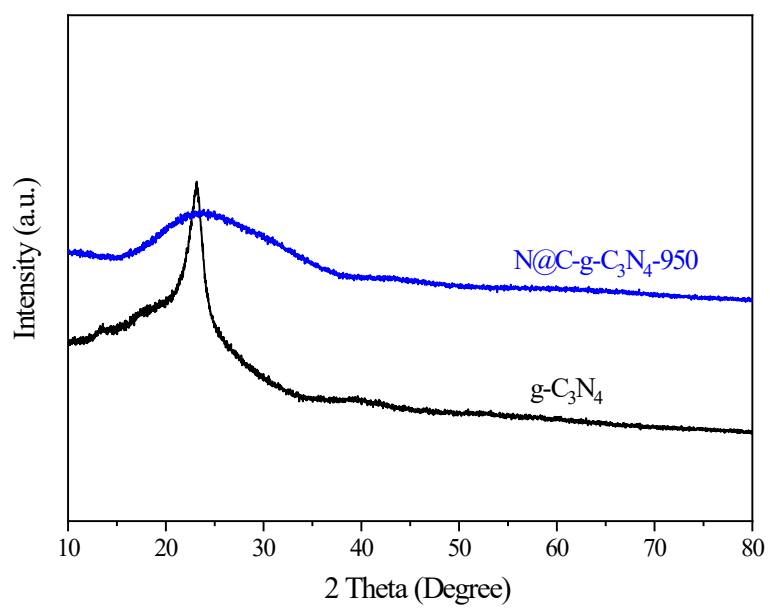

Fig. S4 shows XRD pattern of N@g-C<sub>3</sub>N<sub>4</sub>-950 and g-C<sub>3</sub>N<sub>4</sub> template.

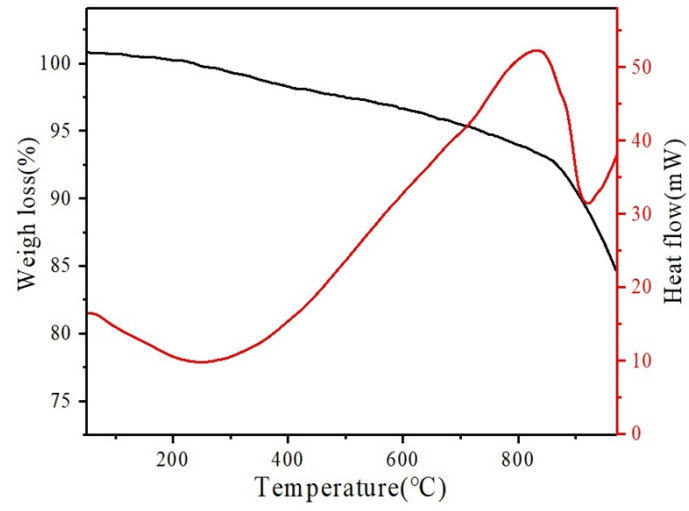

Fig. S5 TGA/DSC analysis of N@C-g- C<sub>3</sub>N<sub>4</sub>-950.

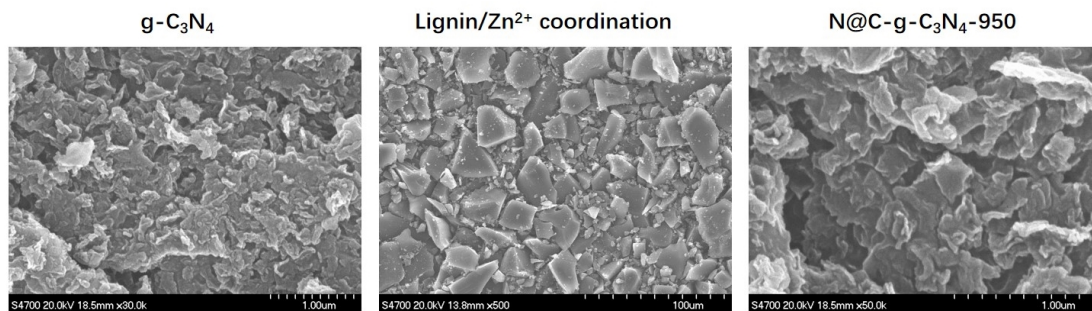

Fig. S6 SEM morphology of g-C<sub>3</sub>N<sub>4</sub>, lignin/Zn<sup>2+</sup> coordination (LC carbon) and N@g-C<sub>3</sub>N<sub>4</sub>-950.

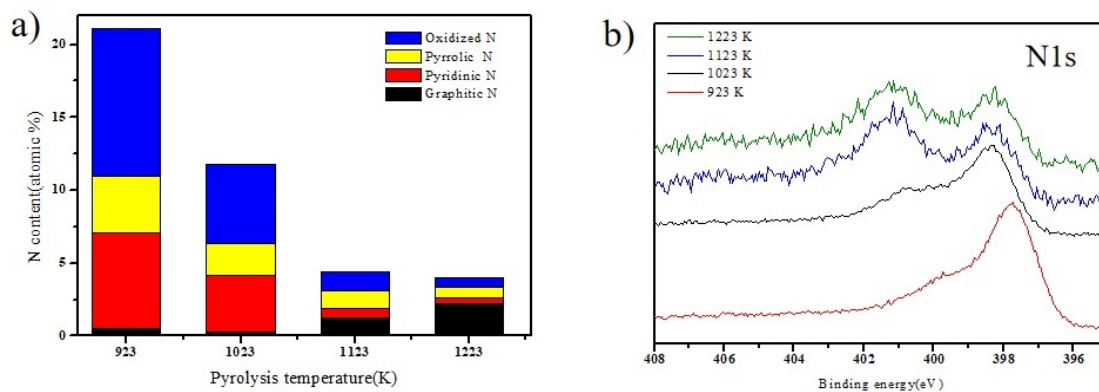

Fig, S7 The relative contents of nitrogen species in N@C with different annealing temperatures of 923 K, 1023 K, 1123 K, and 1223 K.



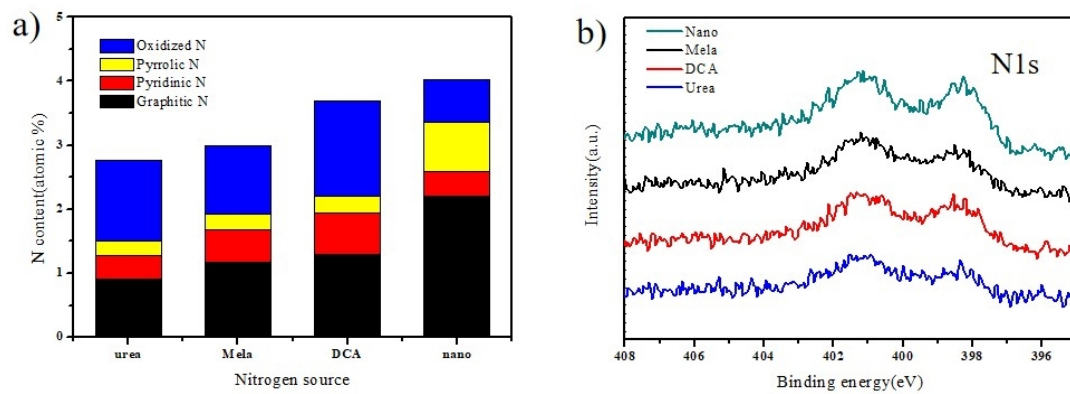

Fig.S8 The relative contents of nitrogen species in N@C with different nitrogen dopants of urea, mela, DCA and g-C<sub>3</sub>N<sub>4</sub>.

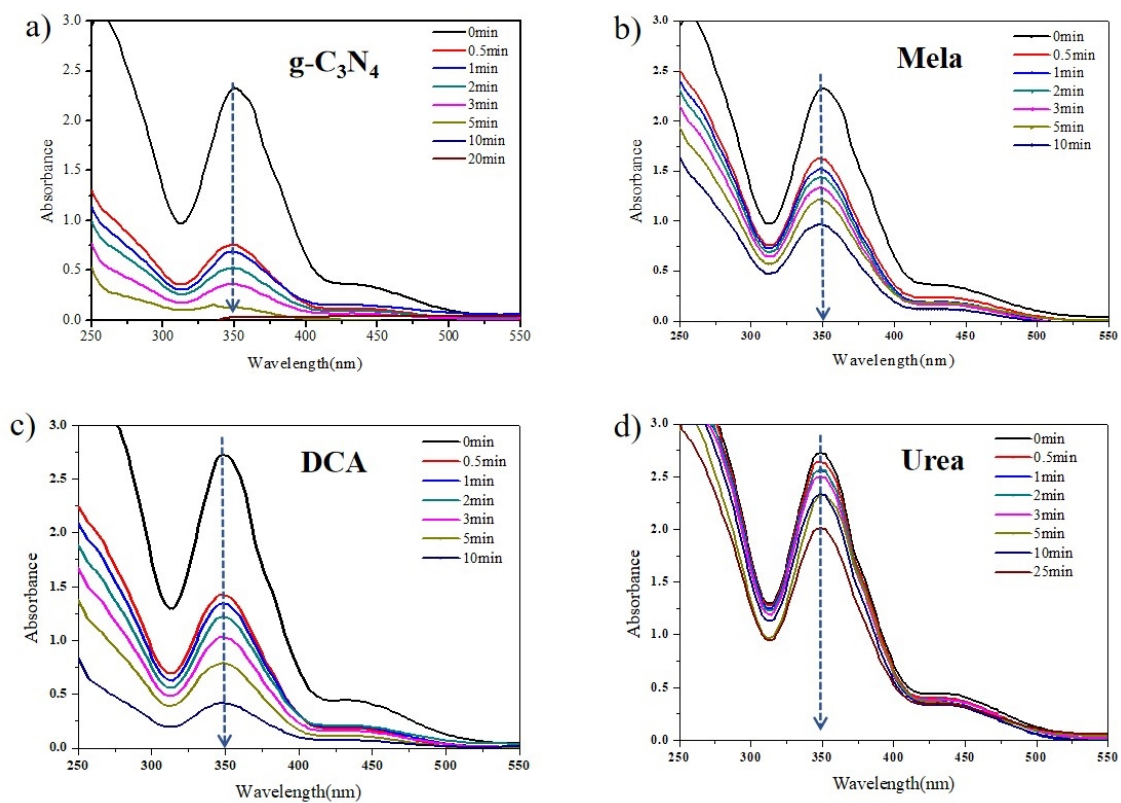

Fig. S9  $\text{Cr}^{6+}$  reduction catalyzed by N@C with different nitrogen dopant. Reaction conditions: 25 mL  $\text{K}_2\text{Cr}_2\text{O}_7$  (0.68 mM), 1 mL  $\text{HCOOH}$  (98%), 25 mg catalyst, temperature 50 °C, stirring rate 500 rpm.

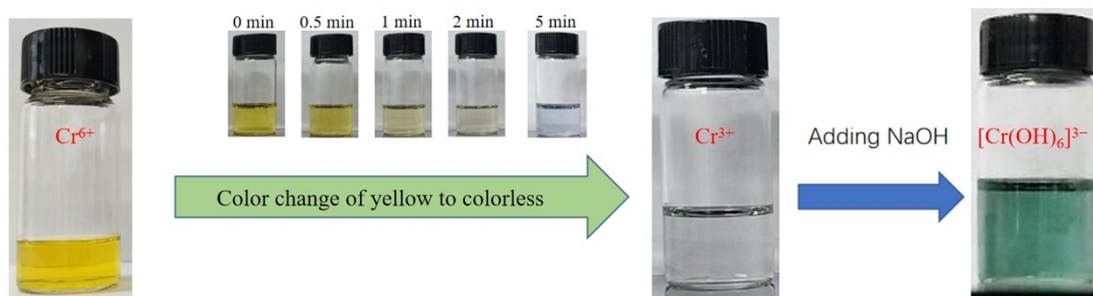

Fig. S10 The photographs of Cr<sup>6+</sup> reduction conversion into colorless Cr<sup>3+</sup> by N@C-g-C<sub>3</sub>N<sub>4</sub>-950 in the presence of HCOOH at different time intervals; and the photograph of green solution of hexahydroxochromate (III) obtained after the addition of excess NaOH solution.

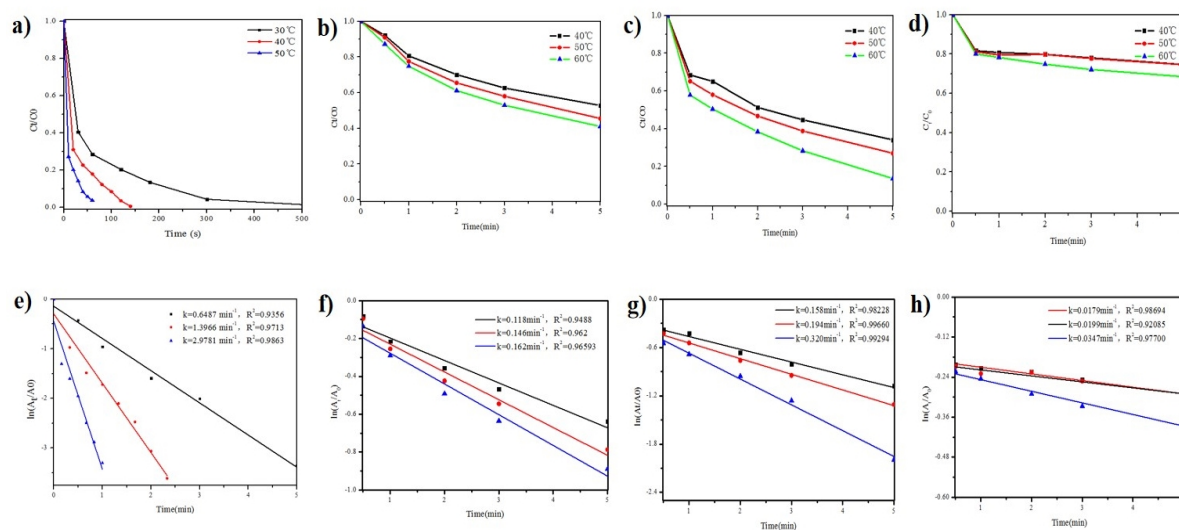

Fig. S11 Apparant rate constant ( $k$ ) of the catalytic reduction of  $\text{Cr}^{6+}$  with  $\text{N@C}$  catalysts. (a,e)  $\text{g-C}_3\text{N}_4$ ; (b,f) Mela; (c, g) DCA; (d, h) Urea. Reaction conditions: 25 mL  $\text{K}_2\text{Cr}_2\text{O}_7$  (0.68 mM) , 1 mL  $\text{HCOOH}$  (98%), 25 mg catalyst, stirring rate 500 rpm.

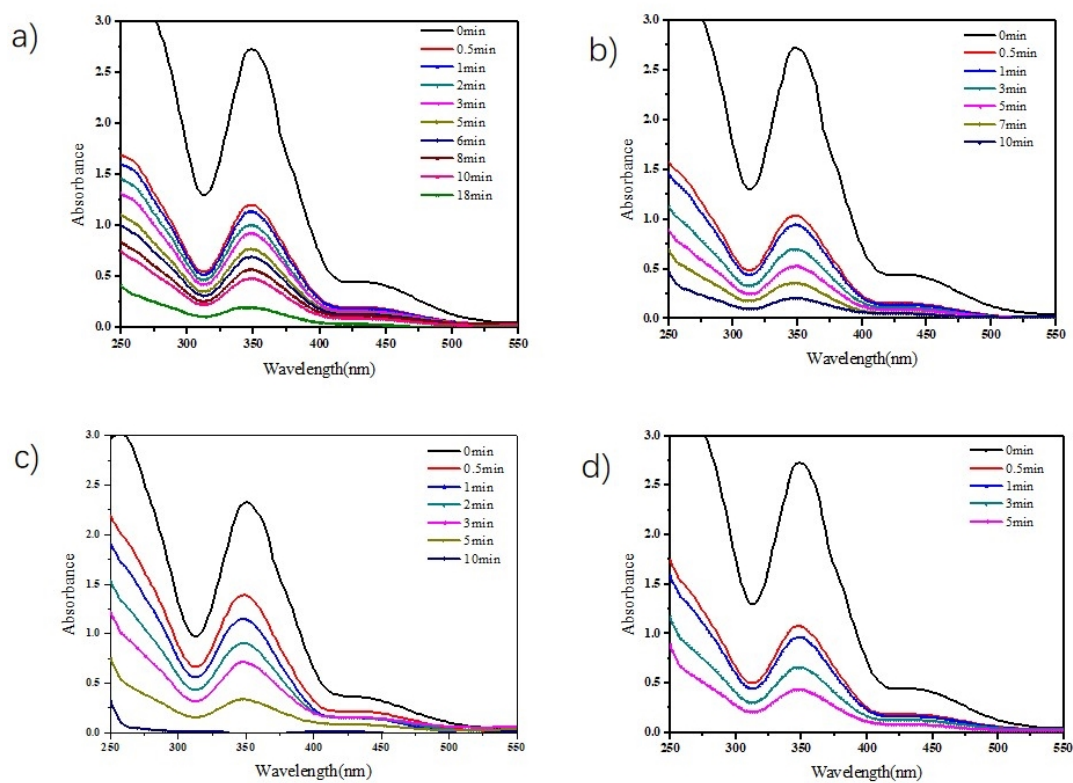

Fig. S12 Effect of HCOOH concentration on Cr<sup>6+</sup> reduction by N@C-gC<sub>3</sub>N<sub>4</sub>-950. (a) 0.01 mM; (b) 0.02 mM; (c) 0.03 mM; (d) 0.04 mM. Other reaction conditions: 25 mL K<sub>2</sub>Cr<sub>2</sub>O<sub>7</sub> (0.68 mM), 25 mg catalyst, temperature 50°C, stirring rate 500 rpm.

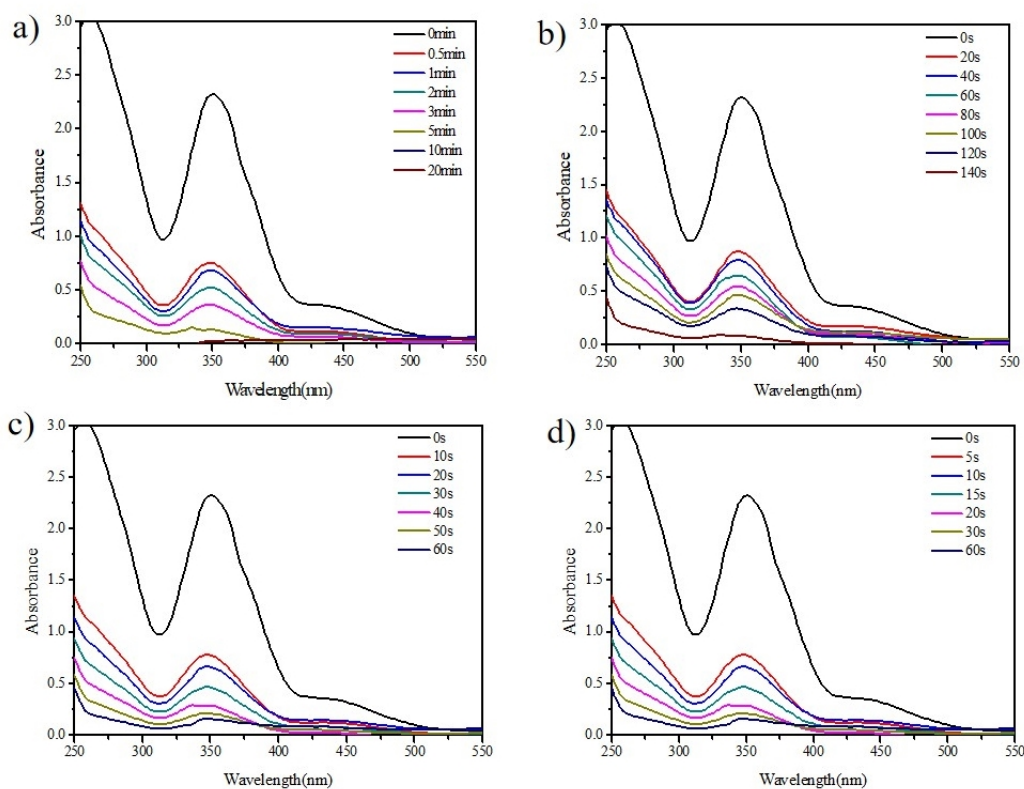

Fig. S13 Effect of reaction temperature on  $\text{Cr}^{6+}$  reduction in the presence of  $\text{HCOOH}$  and  $\text{N@C-gC}_3\text{N}_4$ . (a) room temperature (RT); (b) 40 °C; (c) 50 °C; (d) 60 °C.

Other reaction conditions: 25 mL  $\text{K}_2\text{Cr}_2\text{O}_7$  (0.68 mM), 1 mL  $\text{HCOOH}$  (98%), 25 mg catalyst, stirring rate 500 rpm.

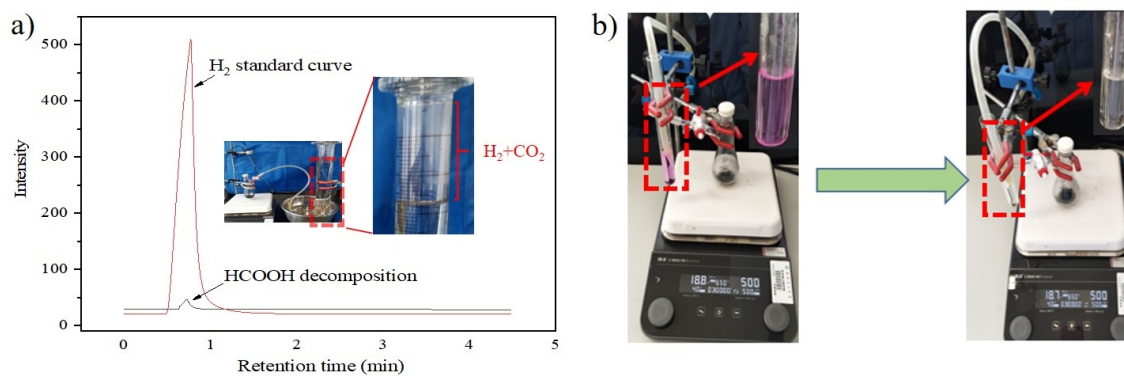

Figure S14 (a) Determination of H<sub>2</sub> decomposed from HCOOH by GC detection; (b) CO<sub>2</sub> evolution from HCOOH was monitored by phenolphthalein in coloration method. Reaction conditions: 25 mL K<sub>2</sub>Cr<sub>2</sub>O<sub>7</sub> (0.68 mM) , 1 mL HCOOH (98%), 25 mg catalyst, temperature 30 °C, stirring rate 500 rpm.

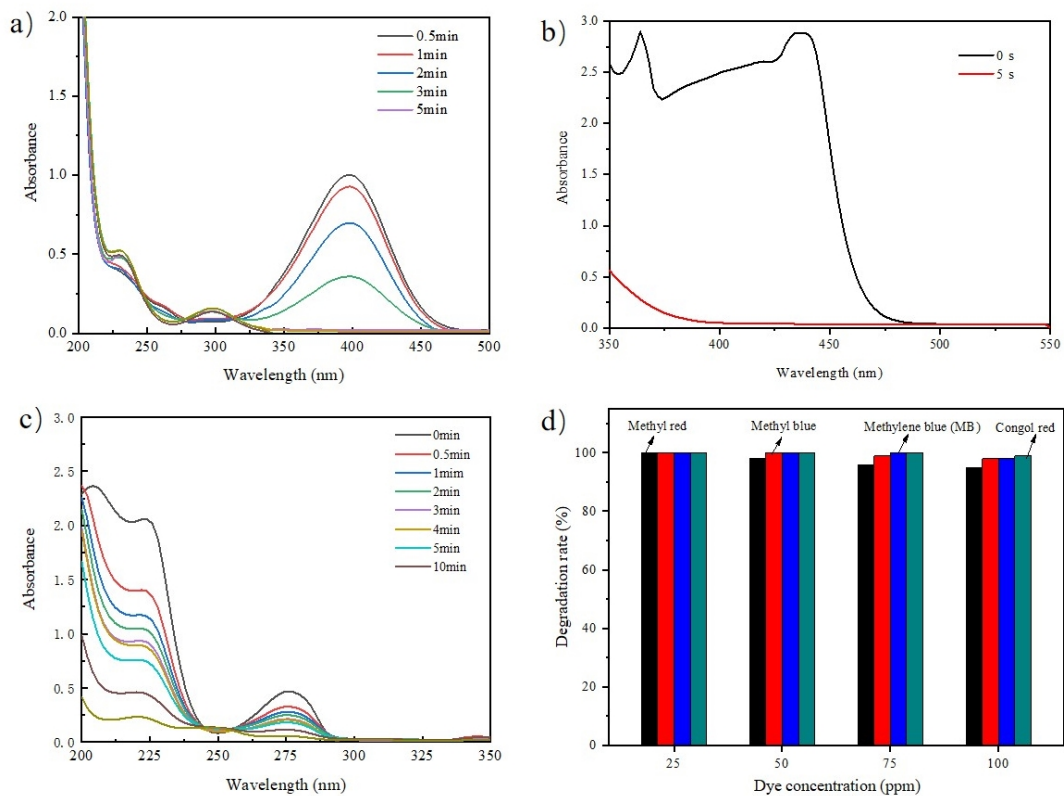

Fig. 15 Extended hydrogenation reactions and removal of organic dyes by N@C-g-C<sub>3</sub>N<sub>4</sub>. (a) 4-NP; (b) K<sub>3</sub>[Fe(CN)<sub>6</sub>]; (c) BPA; (d) organic dyes. Reaction conditions: 25 mg catalyst, room temperature, stirring rate 500 rpm.



Table S1 The atomic ratio (calculation from XPS analysis) and BET analysis of all the catalyst samples

| Catalyst sample                          | C (at%) | N (at%) | O (at%) | Surface area (m <sup>2</sup> . g <sup>-1</sup> ) | Pore size (nm) |
|------------------------------------------|---------|---------|---------|--------------------------------------------------|----------------|
| N@C-g-C <sub>3</sub> N <sub>4</sub> -650 | 72.95   | 18.37   | 8.68    | 362                                              | 17.6           |
| N@C-g-C <sub>3</sub> N <sub>4</sub> -750 | 79.34   | 13.43   | 7.22    | 570                                              | 19.7           |
| N@C-g-C <sub>3</sub> N <sub>4</sub> -850 | 86.05   | 6.68    | 7.28    | 870                                              | 15.7           |
| N@C-g-C <sub>3</sub> N <sub>4</sub> -950 | 90.39   | 4.84    | 4.77    | 903                                              | 17.3           |
| N@C-DCA-950                              | 89.31   | 3.98    | 6.71    | 602                                              | 3.2            |
| N@C-Mela-950                             | 88.95   | 3.90    | 7.15    | 213                                              | 3.6            |
| N@C-Urea-950                             | 89.87   | 2.76    | 7.37    | 633                                              | 1.4            |

Table S2 The N species atomic ratio (calculation from XPS analysis) of all the catalyst samples

---

| Catalyst sample                          | pyridinic N (%) | Pyrrodic N (%) | Graphitic N (%) | Oxidize N (%) |
|------------------------------------------|-----------------|----------------|-----------------|---------------|
| N@C-g-C <sub>3</sub> N <sub>4</sub> -650 | 31.15           | 18.16          | 2.61            | 48.08         |
| N@C-g-C <sub>3</sub> N <sub>4</sub> -750 | 32.68           | 18.71          | 2.46            | 46.15         |
| N@C-g-C <sub>3</sub> N <sub>4</sub> -850 | 14.87           | 28.83          | 28.15           | 28.15         |
| N@C-g-C <sub>3</sub> N <sub>4</sub> -950 | 9.70            | 19.40          | 54.73           | 16.17         |
| N@C-DCA-950                              | 17.30           | 7.03           | 35.14           | 40.54         |
| N@C-Mela-950                             | 17.06           | 8.03           | 39.13           | 35.79         |
| N@C-Urea-950                             | 13.41           | 7.97           | 32.97           | 45.65         |

---
